# Supplementary material for: Improving wellbeing and reducing future world population
Source: PubMed Central journal article supplement (PMC6135380; doi:10.1371/journal.pone.0202851), 2018-09-12
Supplement: pone.0202851.s001.pdf [file pone.0202851.s001.pdf]

## 1 **S1 Text: Details relating to Figure 1: Country groups**

2 We analyzed larger, demographically important nations by excluding countries with populations  
3 < 1 million in 2000; these are mainly small islands but, in the MACs, include two sub-Saharan  
4 mainland countries (Djibouti and Equatorial Guinea) and one northern African country (Western  
5 Sahara). The MACs also excluded the five, southern sub-Saharan African countries, which have  
6 already reached a TFR of 2.51.

7 We used one of two criteria to determine the ODC group. (1) The country had  $TFR \geq 6$   
8 in 1950-55 (the first period for which UN world data are available) or later. (2) If TFR never  
9 reached 6, it reached and exceeded 5.5 and increased or stayed level for at least two estimation  
10 periods before decreasing. For example, India's first three estimated values were: 5.9, 5.9 and  
11 5.89; Jamaica's first four were: 4.22, 5.08, 5.64, and 5.78. The TFRs of nine of the 61 ODCs  
12 never reached 6. Of the 37 MACs only two had maximum  $TFR < 6$ : Central African Republic  
13 (max  $TFR = 5.95$ ) and Gabon (max  $TFR = 5.72$ ). Low initial fertilities in MACs and some  
14 ODCs in South Asia were likely induced by disease-related infertility [1-3], but a few ODCs  
15 may have begun fertility decline before data became available in 1950-55; however, they passed  
16 through the great majority of their declines thereafter. We excluded China because of its unique  
17 1-child policy.

## 18 **References**

- 19 [1] Frank O. Infertility in sub-Saharan Africa: estimates and implications. *Population and*  
20 *Development Review*. 1983;9(1):137-144.
- 21 [2] Mascarenhas MN, Flaxman SR, Boerma T, Vanderpoel S, Stevens GA. National, regional,  
22 and global trends in infertility prevalence since 1990: A systematic analysis of 277 health  
23 surveys. *PLoS Medicine*. 2012;9(12):1-12. doi:10.1371/journal.pmed.1001356.
- 24 [3] Williams J, Ibisomi L, Sartorius B, Kahn K, Collinson M, Tollman S, et al. Convergence in  
25 fertility of South Africans and Mozambicans in rural South Africa, 1993-2009. *Global Health*  
26 *Action*. 2013;6:19236. doi:10.3402/gha.v6i0.19236.
