# Supplementary material for: Improving wellbeing and reducing future world population
Source: PubMed Central journal article supplement (PMC6135380; doi:10.1371/journal.pone.0202851), 2018-09-12
Supplement: pone.0202851.s004.pdf [file pone.0202851.s004.pdf]

## 1 **S4 Text: Population projection methods**

2 We project MAC populations through 2100 based on the approach developed by Raftery and  
3 colleagues [1–4], and now used by the UN.

### 4 **UN Methods**

5 The UN’s population projections use forecasts of TFR and male and female life expectancy  
6 ( $e_0M$  and  $e_0F$ ) over time for 201 countries and 32 other areas. The forecast formulae contain  
7 country-specific parameters and perturbations. Both contribute randomness to the forecasts.

8 In what follows, we refer to predictions of future TFR or  $e_0$  as “forecasts” and predictions  
9 of future populations as “projections.” Each consists of 17 values: every 5-year period from  
10 2015-20 to 2095-2100 for forecasts, and every 5 years from 2020 to 2100 for projections.

11 The parameters and perturbations are modeled as if they arose in two steps. Each involves  
12 “prior” distributions reflecting weak assumptions that make no use (or minimal qualitative  
13 use) of the UN data. First, “world” parameters were randomly chosen from “known” prior  
14 distributions (i.e., specified by the modeler). Some world parameters defined distributions from  
15 which the perturbations were chosen; others were used in the second step, to define further prior  
16 distributions from which each country’s specific parameters were chosen.

17 These parameters apply to past as well as future values. Thus, the UN’s TFR and  $e_0$   
18 data from all countries, for the periods 1950-55 to 2010-15, can be used to update the prior  
19 distributions for the world parameters, giving conditional distributions. These lead to new priors  
20 for the country-specific parameters, which can be updated to obtain conditional distributions for  
21 each country, using only its own data. Each country has the same new prior distributions (since  
22 the world parameters apply to all), but they have different conditional distributions because of  
23 different past data.

24 To make a probabilistic forecast, we first choose world and country-specific parameters in  
25 the same two steps, but using the conditional distributions. The resulting set of parameters  
26 is a “trajectory.” The parameters (and the random perturbations) then give the TFR and  $e_0$   
27 forecasts for each country. We can repeat this process (choose trajectory, calculate forecasts) as  
28 often as we like.

## 29 **Our MAC forecasts and projections**

30 The BayesPop website [5] gives 1000 trajectories. We had to alter their forecasts slightly. The  
31 UN changed the website’s prior distributions for some country-specific e0F parameters because  
32 they led to implausible forecasts; for example, rapid recent improvement (perhaps due to lower  
33 child mortality) caused some countries with currently low life expectancies being forecast to  
34 catch and surpass others with higher ones (see pg. 26-27 of [6]). We used the forecasts from the  
35 website’s trajectories but, for each country and year, added a constant to our 1000 e0F values  
36 so their median equaled the median of the corresponding UN values. We did this for e0M and  
37 TFR as well.

38 A trajectory’s forecasts are converted to age-specific rates of fertility and mortality, as de-  
39 scribed by [5]. Beginning with each country’s 2015 population, these rates are used to project  
40 future populations by the cohort-component method. Thus, each trajectory yields a projection  
41 for each country. The sum of these projections over the countries in a region is the trajectory’s  
42 regional projection.

43 With 1000 trajectories, each country has 1000 projections; its median projection is the median  
44 of these; other quantiles are similar. Medians for regions can be defined the same way, but an  
45 alternative method is described under “Comparing Projections” below.

## 46 **Our ODC-based forecasts and projections**

47 Our hypothesis is that if well-being (ISR) improves in MACs as rapidly as seen or expected in  
48 ODCs, future MAC populations will be lower than currently projected. For each (MAC, ODC)  
49 pair, we assume the MAC’s future ISR improves at the same rate as the ODC’s, and that this  
50 leads to the future sequences of TFR, e0F and e0M for the MAC being the same as were seen or  
51 forecast for the ODC. We substitute these ODC sequences for those forecast for the MAC, and  
52 compare the resulting population projections with the original MAC projections.

53 We first describe our substitution rules. In our description, we use mid-years (e.g., 1953,  
54 2098) to represent periods (1950-55, 2095-2100). Values of ISR, e0 and TFR for years 1953-2013  
55 are observed; the rest are forecasts. However, for brevity, we call them all “forecasts.”

56 We find an ODC year,  $YO > 1953$ , which “matches” a MAC year ( $YM > 2013$ , ideally 2013)  
57 in that the ODC’s ISR in  $YO$  is close to the MAC’s in  $YM$ . We could replace the MAC’s TFR  
58 and e0 forecasts for years  $YM + 5$ ,  $YM + 10$ , etc., by the ODC forecasts for years  $YO + 5$ ,  $YO$   
59  $+ 10$ , etc., but we introduce a delay to be conservative: we keep the MAC’s  $YM + 5$  values, and  
60 replace its values for  $YM + 10$ ,  $YM + 15$ , ... by the ODC’s values for  $YO + 5$ ,  $YO + 10$ , ...

61 We also require the ODC's ISR in YO to be less than the MAC's in YM.

62 Thus, all ODC-based MAC projections use the MAC's own 2018 forecasts of TFR and e0 to  
63 project the 2020 population. If  $YM = 2013$ , the MAC's 2023 forecasts are replaced by the ODC  
64 forecasts for  $YO + 5$  to project the 2025 population. If  $YM > 2013$ , an ODC ISR is matched  
65 with a forecast MAC ISR; then the MAC's own forecasts are used for years 2018, 2023, ...,  $YM$   
66  $+ 5$ , and the ODC's forecasts for  $YO + 5$ , ..., are used after that.

67 Formally, for each ODC, we made an ISR vector of 30 components:  $IO[Y] =$  ODC's ISR  
68 value in year Y, for  $Y = 1953, \dots, 2013, 2018, \dots, 2098$ .

69 For each MAC, we made an ISR vector of 18 components:  $IM[Y] =$  MAC's ISR value in year  
70 Y, for  $Y = 2013, 2018, \dots, 2098$ .

71 Now define YO to be the first year in which  $IO[YO] < IM[YM] \leq IO[YO + 5]$  for some  
72 year, YM, in the MAC vector. Then the ODC-based forecast of (say) TFR for this MAC would  
73 be:

- 74 i. For years 2013, 2018, ...,  $YM + 5$ , the MAC values;
- 75 ii. For years  $YM + 10, \dots, 2098$ , the ODC values for years  $YO + 5, \dots, YO + K$ ,

76 where  $K = 2093 - YM$ .

77 For the 2072 (MAC, ODC) pairs, this procedure gives  $YM = 2013$  in 1,985 cases. For  
78 example, Angola's 2013 ISR is 90.4%; Iran's values for 1973 and 1978 are 87.6 and 90.5; thus  
79  $YM = 2013$  and  $YO = 1973$ , since  $IO[1973] (= 87.6) < IM[2013] (= 90.4) \leq IO[1978] (= 90.5)$ .  
80 Thus, the Iran-based projection for Angola uses Angola's TFR and e0 forecasts for 2018, but  
81 Iran's 1978 forecasts for 2023.

82 There are 43 cases with  $IO[1953] > IM[2013]$ , so the MAC's 2013 ISR is less than all the  
83 ODC's values. For example, Chad's values for 2013, 2018 and 2023 are 90.4, 91.3 and 92.2;  
84 Panama's 1953 and 1958 values are 91.4 and 92.6. Thus  $YM = 2023$  and  $YO = 1953$ , since  
85  $IO[1953] < IM[2023] \leq IO[1958]$ . The Panama-based projection for Chad uses Chad's TFR and  
86 e0 forecasts up to 2028, but Panama's 1958 forecasts for 2033.

87 There are 19 cases with  $IO[2013] < IM[2013]$  but the forecast ISR increases sufficiently faster  
88 for the ODC than for the MAC that the criterion can be satisfied. For example, Pakistan's 2013  
89 ISR is 93, while Gabon's is 95.7; but Pakistan's values for 2073 and 2078 are 98.2 and 98.5, and  
90 Gabon's for 2068 is 98.4, so  $YM = 2068$  and  $YO = 2073$ . The Pakistan-based projection for  
91 Gabon uses Gabon's TFR and e0 forecasts up to 2073, but Pakistan's 2078 forecasts for 2078.

92 Finally, there are 25 cases with  $IO[2013] < IM[2013]$  where the criterion gives  $YM > 2088$ ,

93 so there are no years in the sequence  $YO + 5, \dots, YO + K$  above. For these (MAC, ODC) pairs,  
94 the “ODC-based” projection of the MAC population was the MAC’s own original projection.

95 There were 37 MACs, 56 ODCs and 1000 trajectories. For 24 MACs, this procedure gave a  
96 population projection for each combination of an ODC and a trajectory. Due to these last 25  
97 cases, eight MACs could be combined with only 55 ODCs, three with 54, one with 53 and one  
98 (Madagascar) with 48.

## 99 **Comparing UN and ODC-based MAC Projections**

100 Some choices need to be made in calculating projected regional (e.g. total MAC) median and  
101 quantiles of the population. For a single country, a projected value is produced for each tra-  
102 jectory (see above). To project the sum of all the MAC populations, we can sum the country  
103 projections for each trajectory and then obtain quantiles over the trajectories. Trajectories are  
104 independent, but projections for different countries based on the same trajectory are correlated  
105 since the common world parameters affect both perturbations and country-specific parameters.  
106 The correlation increases the spread of the sum, but some correlation is likely since the MACs  
107 are near each other [7].

108 The UN adjusts this “trajectory-based” regional method. Its “median” projection for the  
109 region is defined as the sum of the median projections for the countries in it. This is usu-  
110 ally different from the median of the trajectory-based sums. Thus, a constant (UN median -  
111 trajectory-based median), is added to each trajectory-based quantile, to obtain a set of adjusted  
112 quantiles. The adjustment is usually small. We follow these procedures.

113 This does not introduce a “bias.” The median of a sample is not usually an unbiased estimate  
114 of the median of the underlying distribution. The aim here is to describe the center and spread  
115 of the projections with only minor distortion due to extreme observations. If each country’s  
116 set of projections is positively skewed, then occasional very large projections could affect the  
117 trajectory-based median of the sum but will not affect the UN median. The UN median is also  
118 natural in the sense that a reader might expect country estimates to add to the regional estimate.

119 For a given MAC, options for the “median” ODC-based projection include:

- 120 1. find the median of all projections ( $56 \text{ ODCs} \times 1000 \text{ trajectories}$ );
- 121 2. find the median over trajectories for each ODC; get the median of these medians;
- 122 3. find the median over ODCs for each trajectory; get the median of these medians.

123 The answers differ, though by far less than each does from the UN median or our MAC-based  
124 median. Only (1) extends directly to other quantiles.

125 We marginally prefer to use median (2) as the “center” estimate, and to adjust the quantiles  
126 obtained from (1) by adding median (2) - median (1) to each. This seems closer to the UN  
127 approach when distributions are to be combined, and emphasizes the variation over the non-  
128 random ODCs rather than the trajectories.

129 For quantiles of projections of sums of the MACs we considered three options:

130 A. For each ODC and trajectory, sum the projections over MACs. Get quantiles of these  
131 56,000 sums.

132 B. For each MAC and ODC, get the median over trajectories. For each ODC, add these  
133 medians over MACs. Get quantiles of these 56 sums.

134 C. For each MAC and trajectory, get the median over ODCs. For each trajectory, add these  
135 medians over MACs. Get quantiles of these 1,000 sums.

136 We prefer method (B), for reasons like those before. All three methods can be adjusted so  
137 that the center is the sum of the MAC medians, as given by (1), (2) or (3). We prefer to adjust  
138 by (2), so our quantiles are given by  $\text{quantiles}(B) + (\text{Sum of medians}(2) - \text{median}(B))$ .

139 With our 5-year delay (so most ODC-based rates begin in 2023 rather than 2018), our median  
140 ODC-based projection for the sum of the MACs in 2100 is 2.86 billion. Without the delay, it is  
141 2.43 billion. The UN’s median projection is 3.97 billion.

142 MAC projections do not include international migration, which would reduce our projected  
143 total MAC population for 2100 by approximately 50 million [7]. Moreover, out-migration from  
144 MACs, inevitably to lower-fertility countries, may have negligible effects on fertility in non-  
145 MACs as there is evidence that the migrants’ fertility declines to levels prevailing in the recipient  
146 nation [8].

## 147 **References**

148 [1] Alkema L, Raftery AE, Gerland P, Clark SJ, Pelletier F, Buettner T, et al. Probabilistic  
149 projections of the total fertility rate for all countries. *Demography*. 2011;48(3):815–839.  
150 doi:10.1007/s13524-011-0040-5.

- 151 [2] Raftery AE, Li N, Ševčíková H, Gerland P, Heilig GK. Bayesian probabilistic popu-  
152 lation projections for all countries. *Proceedings of the National Academy of Sciences*.  
153 2012;109(35):13915–13921. doi:10.1073/pnas.1211452109.
- 154 [3] Raftery AE, Alkema L, Gerland P. Bayesian population projections for the United Nations.  
155 *Statistical Science*. 2014;29:58–68.
- 156 [4] Gerland P, Raftery AE, Ševčíková H, Li N, Gu D, Spoorenberg T, et al.  
157 World population stabilization unlikely this century. *Science*. 2014;346(6206):234–237.  
158 doi:10.1126/science.1257469.
- 159 [5] Ševčíková H, Raftery AE. BayesPop: Probabilistic population projections. *Journal of Sta-*  
160 *tistical Software*. 2016;75(5):1–29.
- 161 [6] Garenne M. Education and fertility in sub-Saharan Africa: A longitudinal perspective.  
162 Calverton, Maryland, USA: ICF International; 2012.
- 163 [7] United Nations. World population prospects: Methodology of the United Nations population  
164 estimates and projections. New York: United Nations; 2015. Available from: [https://esa.](https://esa.un.org/unpd/wpp/)  
165 [un.org/unpd/wpp/](https://esa.un.org/unpd/wpp/).
- 166 [8] Williams J, Ibisomi L, Sartorius B, Kahn K, Collinson M, Tollman S, et al. Convergence in  
167 fertility of South Africans and Mozambicans in rural South Africa, 1993-2009. *Global Health*  
168 *Action*. 2013;6:19236. doi:10.3402/gha.v6i0.19236.
