# Supplementary material for: Improving wellbeing and reducing future world population
Source: PubMed Central journal article supplement (PMC6135380; doi:10.1371/journal.pone.0202851), 2018-09-12
Supplement: pone.0202851.s005.pdf [file pone.0202851.s005.pdf]

## 1 **S5 Text: Data on per-capita income**

2 Per capita incomes were obtained by dividing the “Output-side real GDP at chained PPPs (in  
3 mil. 2011US\$)” in the Penn World Table [1] by the concurrent population (in millions). The  
4 historic values are from the mid-point of the 5-year period for which the relevant ISR has been  
5 estimated. When estimates begin only after that year, the number is for the closest year up to  
6 five years later. No estimates are available within this time limit for a few countries (Kuwait,  
7 Libya, Turkmenistan, Uzbekistan, and Papua New Guinea). Among MACs, estimates are not  
8 available for Eritrea, Somalia and South Sudan.

## 9 **References**

- 10 [1] Feenstra RC, Inklaar R, Timmer MP. The next generation of the Penn World Table. Amer-  
11 ican Economic Review. 2015;105(10):3150–3182.
