# Supplementary material for: Improving wellbeing and reducing future world population
Source: PubMed Central journal article supplement (PMC6135380; doi:10.1371/journal.pone.0202851), 2018-09-12
Supplement: pone.0202851.s006.pdf [file pone.0202851.s006.pdf]

## 1 **S6 Text: Data on armed conflicts**

2 Data on armed conflict since 1946 have been collected and presented by the Uppsala Conflict  
3 Data Program at the Department of Peace and Conflict Research, Uppsala University [1]. We  
4 did two analyses for the period 1990-2014.

5 First, the database contains the number of battle-related deaths (soldiers and civilians killed  
6 in combat in state-based armed conflict) in each year in each nation, and for each nation we  
7 calculated the total number of deaths over the period 1990-2014. Second, we calculated the total  
8 intensity over the period. In the database, for each calendar year, conflict resulting in 25-999  
9 battle-related deaths per year is scored an intensity of “1” (the most frequent score); a year with  
10  $\geq 1000$  deaths is scored “2”. For each country, we summed the scores over the period to obtain  
11 a measure that combines frequency and intensity of conflicts over the period.

## 12 **References**

13 [1] Peace Research Institute Oslo. Data on Armed Conflict; 2008. Available from: [https:](https://www.prio.org/Data/Armed-Conflict/)  
14 [//www.prio.org/Data/Armed-Conflict/](https://www.prio.org/Data/Armed-Conflict/).
